# Supplementary material
Source: PubMed Central journal article supplement (PMC7919156)
Supplement: AnnalsATS.202003-267OC_pennington_data_supplement.pdf [file AnnalsATS.202003-267OC_pennington_data_supplement.pdf]

**Online Data Supplement**

**The Impact of Antifungal Prophylaxis in Lung Transplant Recipients**

Kelly M. Pennington MD, Hayley J. Dykhoff, Xiaoxi Yao PhD, Lindsey R. Sangaralingham MPH, Nilay D. Shah PhD, Steve G. Peters MD, Jason N. Barreto PharmD, Raymund R. Razonable MD, Cassie C. Kennedy MD

**Supplementary Figure 1:** Cumulative risk for aspergillosis- or zygomycosis-specific fungal infections in lung transplant recipients receiving antifungal prophylaxis with a systemic mold-active agent compared to no antifungal prophylaxis.

|                         | Events per 100 person-years |                           | Hazard ratio (95% C.I.) | p-value |
|-------------------------|-----------------------------|---------------------------|-------------------------|---------|
|                         | No prophylaxis              | Prophylaxis (mold-active) |                         |         |
| <b>Fungal infection</b> | 20.53                       | 13.05                     | 0.65 (0.40, 1.05)       | 0.080   |

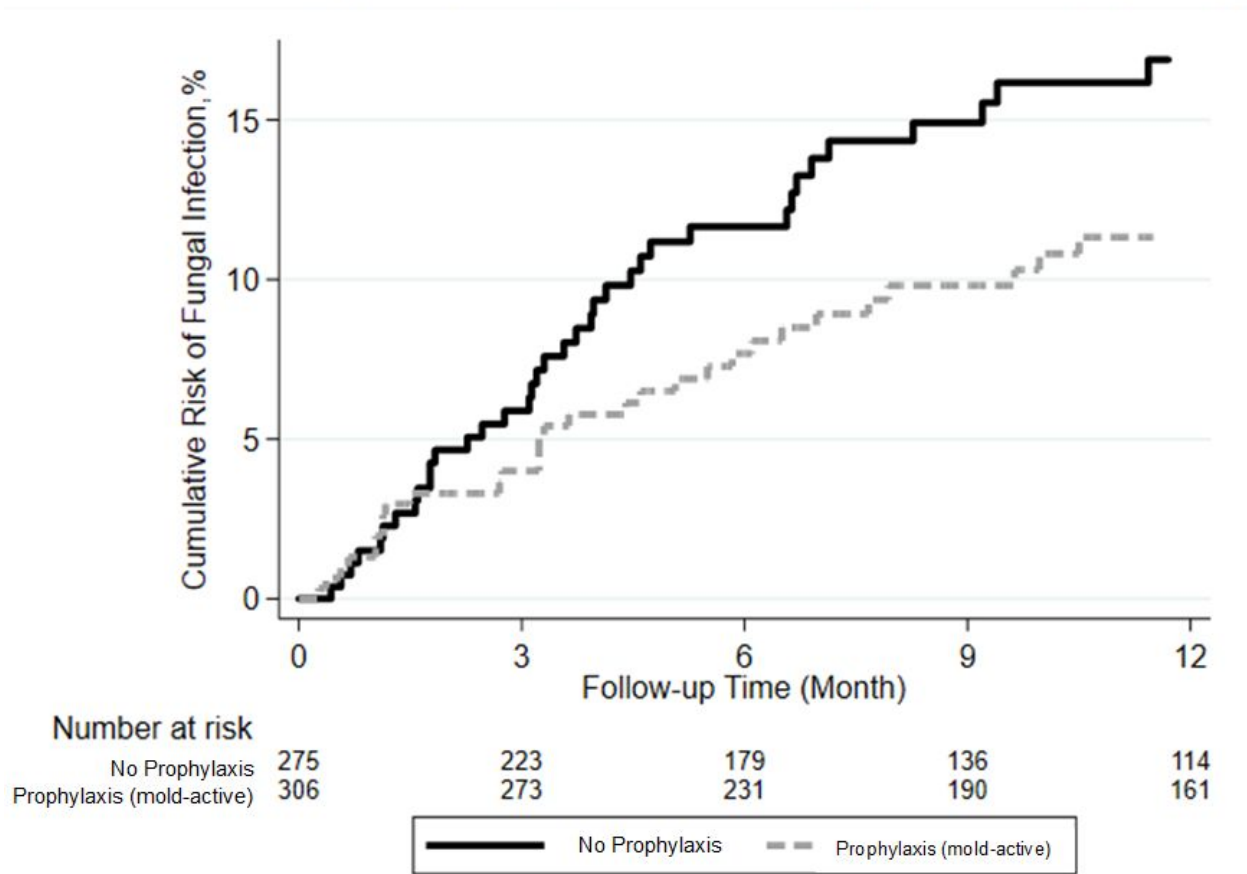

**Supplementary Table 1:** Baseline characteristics of the matched cohort of patients receiving antifungal prophylaxis compared to patients receiving no prophylaxis. Age and Elixhauser score are presented as means with standard deviation parenthetically. The remainder is presented as the absolute number with percentage of the cohort indicated parenthetically.

|                                         | Unmatched (N=662)   |                 |                         | 1:1 Propensity-score matched (N=464) |                 |                         |
|-----------------------------------------|---------------------|-----------------|-------------------------|--------------------------------------|-----------------|-------------------------|
|                                         | Non-treated (N=275) | Treated (N=387) | Standardized Difference | Non-treated (N=232)                  | Treated (N=232) | Standardized Difference |
| <b>Age</b>                              | 55.3 (13.4)         | 55.0 (12.7)     | 0.026                   | 55.2 (13.3)                          | 55.2 (12.6)     | 0.002                   |
| <b>Sex</b>                              |                     |                 |                         |                                      |                 |                         |
| Female                                  | 115 (41.8%)         | 162 (41.9%)     | 0.001                   | 95 (40.9%)                           | 90 (38.8%)      | 0.044                   |
| Male                                    | 160 (58.2%)         | 225 (58.1%)     | 0.001                   | 137 (59.1%)                          | 142 (61.2%)     | 0.044                   |
| <b>Region</b>                           |                     |                 |                         |                                      |                 |                         |
| Midwest                                 | 77 (28.0%)          | 85 (22.0%)      | 0.140                   | 61 (26.3%)                           | 66 (28.4%)      | 0.048                   |
| Northeast                               | 41 (14.9%)          | 31 (8.0%)       | 0.218                   | 28 (12.1%)                           | 31 (13.4%)      | 0.039                   |
| South                                   | 140 (50.9%)         | 208 (53.7%)     | 0.057                   | 126 (54.3%)                          | 126 (54.3%)     | 0.000                   |
| West                                    | 17 (6.2%)           | 63 (16.3%)      | 0.324                   | 17 (7.3%)                            | 9 (3.9%)        | 0.150                   |
| <b>Race/ethnicity</b>                   |                     |                 |                         |                                      |                 |                         |
| Black                                   | 15 (5.5%)           | 21 (5.4%)       | 0.001                   | 11 (4.7%)                            | 15 (6.5%)       | 0.075                   |
| Hispanic                                | 25 (9.1%)           | 23 (5.9%)       | 0.120                   | 20 (8.6%)                            | 17 (7.3%)       | 0.048                   |
| Other/unknown                           | 52 (18.9%)          | 68 (17.6%)      | 0.035                   | 41 (17.7%)                           | 40 (17.2%)      | 0.011                   |
| White                                   | 183 (66.5%)         | 275 (71.1%)     | 0.098                   | 160 (69.0%)                          | 160 (69.0%)     | 0.000                   |
| <b>Elixhauser score</b>                 | 3.6 (2.3)           | 3.6 (2.4)       | 0.014                   | 3.6 (2.3)                            | 3.5 (2.3)       | 0.013                   |
| <b>Indication for transplant</b>        |                     |                 |                         |                                      |                 |                         |
| COPD & bronchiectasis                   | 50 (18.2%)          | 82 (21.2%)      | 0.076                   | 44 (21.0%)                           | 41 (17.7%)      | 0.033                   |
| Cystic fibrosis                         | 45 (16.4%)          | 51 (13.2%)      | 0.090                   | 34 (13.1%)                           | 31 (13.4%)      | 0.037                   |
| Idiopathic pulmonary fibrosis (IPF)     | 64 (23.3%)          | 95 (24.5%)      | 0.030                   | 57 (24.6%)                           | 55 (23.7%)      | 0.020                   |
| Non-IPF interstitial lung disease       | 101 (36.7%)         | 142 (36.7%)     | 0.001                   | 87 (35.7%)                           | 95 (40.9%)      | 0.071                   |
| Other indication (including PH)         | 15 (5.5%)           | 17 (4.4%)       | 0.049                   | 10 (5.6%)                            | 10 (4.3%)       | 0.000                   |
| <b>Single vs double transplant</b>      |                     |                 |                         |                                      |                 |                         |
| Single transplant                       | 84 (30.5%)          | 118 (30.5%)     | 0.001                   | 69 (32.1%)                           | 79 (34.1%)      | 0.093                   |
| Double transplant                       | 191 (69.5%)         | 269 (69.5%)     | 0.001                   | 163 (67.9%)                          | 153 (65.9%)     | 0.093                   |
| <b>Year of admission for transplant</b> |                     |                 |                         |                                      |                 |                         |
| 2005-2007                               | 53 (19.3%)          | 54 (14.0%)      | 0.143                   | 41 (16.3%)                           | 46 (19.8%)      | 0.055                   |
| 2008-2010                               | 55 (20.0%)          | 55 (14.2%)      | 0.154                   | 41 (17.9%)                           | 49 (21.1%)      | 0.087                   |
| 2011-2014                               | 78 (28.4%)          | 101 (26.1%)     | 0.051                   | 66 (27.8%)                           | 66 (28.4%)      | 0.000                   |
| 2015-2018                               | 89 (32.4%)          | 177 (45.7%)     | 0.277                   | 84 (38.1%)                           | 71 (30.6%)      | 0.119                   |

Abbreviations: COPD- Chronic Obstructive Pulmonary Disease, PH – Pulmonary Hypertension

**Supplementary Table 2:** Sensitivity analysis using propensity score matching to compare lung transplant recipients receiving antifungal prophylaxis versus those not receiving prophylaxis.

|                  | Events per 100 person-years |                     | HR (95% CI)       | p-value |
|------------------|-----------------------------|---------------------|-------------------|---------|
|                  | No prophylaxis (N=252)      | Prophylaxis (N=252) |                   |         |
| Mortality        | 18.14                       | 9.65                | 0.54 (0.30, 0.95) | 0.034   |
| Fungal infection | 23.81                       | 13.16               | 0.56 (0.33, 0.94) | 0.028   |

**Supplementary Table 3:** Falsification endpoint test in overlap-weighted cohort.

|                       | Events per 100 person-years |                     | HR (95% CI)       | p-value |
|-----------------------|-----------------------------|---------------------|-------------------|---------|
|                       | No prophylaxis (N=312)      | Prophylaxis (N=395) |                   |         |
| Myocardial Infarction | 1.31                        | 0.58                | 0.43 (0.12, 1.56) | 0.201   |
| Fracture              | 3.98                        | 3.20                | 0.77 (0.41, 1.47) | 0.432   |

Abbreviations: CI- confidence interval, HR- hazard ratio
